# Supplementary material for: Ocean acidification alters properties of the exoskeleton in adult Tanner crabs, Chionoecetes bairdi
Source: Oxford University Press journal article supplement (doi:10.1242/jeb.232819), 2021-01-12
Supplement: jeb232819supp.pdf [file jeb232819supp.pdf]

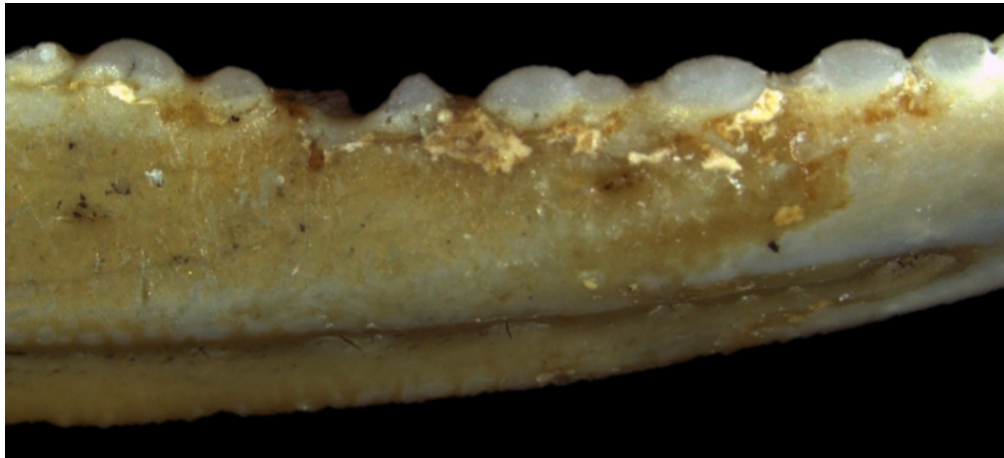

**1 - Minimal damage.** Denticles distinct and clearly visible. Little to no pitting and erosion. Surface mostly smooth and even.

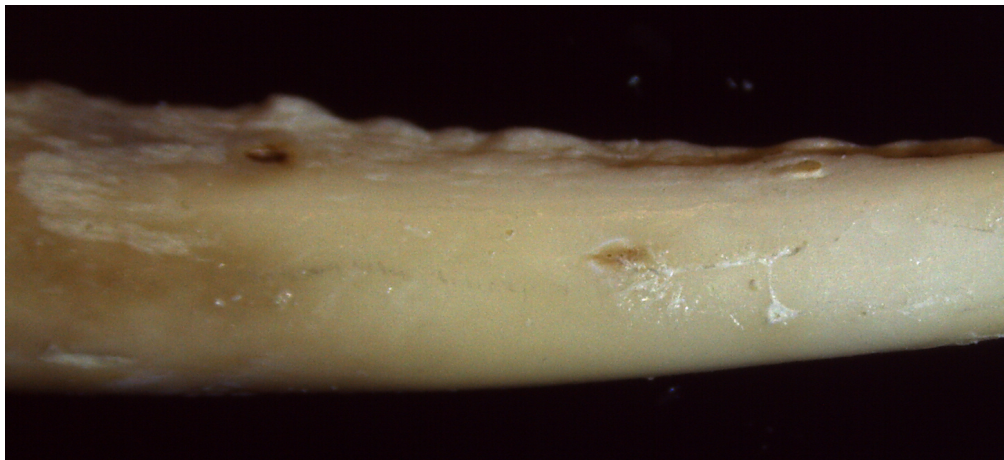

**2 - Moderate damage.** Denticles chipped or worn, but visible. Pitting and erosion limited to specific areas of the pollex surface. Surface mostly smooth and even.

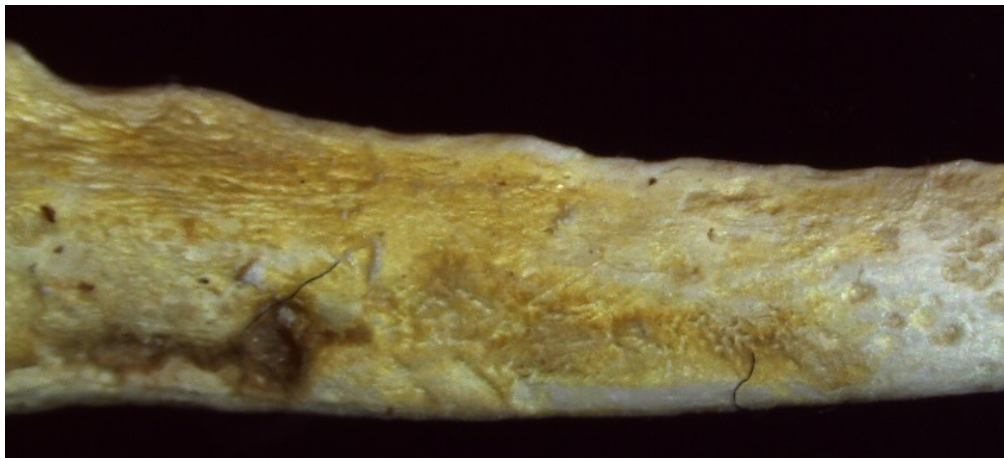

**3 - Extensive damage.** Denticles missing or severely damaged. Extensive pitting and erosion of most of the pollex surface. Surface is rough and uneven.

**Fig. S1. Scoring definitions for pollex samples.** Each sample was scored by four independent evaluators without knowledge of the pH treatment.

**Table S1. Summary statistics for assessments for cuticle microhardness (VHN) of Tanner crab, *Chionoecetes bairdi*.**

|                 | <b>8.1</b>        |          | <b>7.8</b>        |          | <b>7.5</b>        |          |
|-----------------|-------------------|----------|-------------------|----------|-------------------|----------|
|                 | Mean $\pm$ s.e.m. | <i>N</i> | Mean $\pm$ s.e.m. | <i>N</i> | Mean $\pm$ s.e.m. | <i>N</i> |
| <i>Carapace</i> |                   |          |                   |          |                   |          |
| Dry             | 29.7 $\pm$ 2.2    | 10       | 30.5 $\pm$ 2.5    | 10       | 22.0 $\pm$ 2.8    | 6        |
| Wet             | 11.1 $\pm$ 0.8    | 10       | 9.3 $\pm$ 0.8     | 10       | 9.6 $\pm$ 0.6     | 6        |
| <i>Claw</i>     |                   |          |                   |          |                   |          |
| Dry             | 121.5 $\pm$ 8.2   | 7        | 104.9 $\pm$ 5.7   | 10       | 69.0 $\pm$ 9.2    | 7        |
| Wet             | 105.2 $\pm$ 10.6  | 7        | 88.8 $\pm$ 10.2   | 10       | 71.8 $\pm$ 8.9    | 7        |

**Table S2. Summary statistics and statistical comparisons for cuticle assessments of Tanner crab, *Chionoecetes bairdi*.**

| Parameter                                        | 8.1                      |    | 7.8                       |    | 7.5                      |   | ANOVA (F) or<br>Kruskal-Wallis (H) |
|--------------------------------------------------|--------------------------|----|---------------------------|----|--------------------------|---|------------------------------------|
|                                                  | Mean ± s.e.m.            | N  | Mean ± s.e.m.             | N  | Mean ± s.e.m.            | N |                                    |
| <i>Carapace</i>                                  |                          |    |                           |    |                          |   |                                    |
| Thickness (μm)                                   | 577 ± 22 <sup>A</sup>    | 10 | 564 ± 16 <sup>AB</sup>    | 10 | 488 ± 35 <sup>B</sup>    | 7 | F <sub>26</sub> =3.7, p=0.040      |
| Carapace erosion (%)                             | 0 ± 0 <sup>A</sup>       | 10 | 22.2 ± 13.8 <sup>B</sup>  | 9  | 57.1 ± 18.7 <sup>C</sup> | 7 | (see text)                         |
| v <sub>2</sub> peak position (cm <sup>-1</sup> ) | 866.3 ± 1.3 <sup>A</sup> | 10 | 866.8 ± 1.3 <sup>A</sup>  | 10 | 872.4 ± 0.1 <sup>B</sup> | 5 | H <sub>2</sub> =11.2, p=0.004      |
| <i>Claw</i>                                      |                          |    |                           |    |                          |   |                                    |
| Thickness (μm)                                   | 638 ± 60 <sup>A</sup>    | 7  | 516 ± 27 <sup>AB</sup>    | 10 | 439 ± 50 <sup>B</sup>    | 7 | F <sub>23</sub> =4.6, p=0.022      |
| Pollex damage                                    | 1.67 ± 0.12 <sup>A</sup> | 10 | 2.34 ± 0.12 <sup>B</sup>  | 10 | 2.75 ± 0.09 <sup>B</sup> | 7 | H <sub>2</sub> =16.1, p=0.000      |
| v <sub>2</sub> peak position (cm <sup>-1</sup> ) | 871.8 ± 0.1 <sup>A</sup> | 7  | 871.7 ± 0.2 <sup>AB</sup> | 9  | 872.2 ± 0.1 <sup>B</sup> | 7 | H <sub>2</sub> =9.1, p=0.010       |

Means  $\pm$  standard errors (s.e.m.), sample sizes, and ANOVA results are shown. For carapace erosion, the best-fit maximum-likelihood estimates are presented. Groups marked with different letters are significantly different as shown by Tukey HSD post-hoc analysis or model AICc comparison (Carapace erosion; see main text for details). Pollex damage was scored on a scale of 1–3 with 1 indicating minimal damage and 3 indicating extensive damage (see Fig. S1). Units for all other parameters are listed.
